# Supplementary material for: New dioxo–molybdenum(vi) and –tungsten(vi) complexes with N-capped tripodal N2O2 tetradentate ligands: Synthesis, structures and catalytic activities towards olefin epoxidation
Source: Royal Society of Chemistry journal article supplement (doi:10.1039/b926864b), 2010-01-01
Supplement: b926864b.pdf [file b926864b.pdf]

**Supplementary Information for**

**New Dioxo–Molybdenum(VI) and –Tungsten(VI) Complexes  
with *N*-capped Tripodal  $N_2O_2$  Tetradentate Ligands:  
Synthesis, Structures and Catalytic Activities  
towards Olefin Epoxidation**

Yee-Lok Wong,<sup>a,b</sup> Lok H. Tong,<sup>b,c</sup> Jonathan R. Dilworth,\*<sup>b</sup>  
Dennis P. K. Ng\*<sup>a</sup> and Hung Kay Lee\*<sup>a</sup>

<sup>a</sup> *Department of Chemistry, The Chinese University of Hong Kong,  
Shatin, New Territories, Hong Kong SAR, People's Republic of China*

<sup>b</sup> *Chemistry Research Laboratory, Department of Chemistry, University of Oxford,  
12 Mansfield Road, Oxford, UK OX1 3TA*

<sup>c</sup> *Section of Chemistry and Biochemistry, University of Geneva,  
30 Quai Ernest-Ansermet, 1211 Geneva, Switzerland*

*Corresponding authors' e-mails:*

*hklee@cuhk.edu.hk, jon.dilworth@chem.ox.ac.uk, and dkpn@cuhk.edu.hk*

## EXPERIMENTAL

### 1. Synthesis of mono- and di-*tert*-butyl substituted 2-hydroxybenzaldehydes

**3,5-Di-*tert*-butyl-2-hydroxybenzaldehyde.** To a solution mixture of 3,5-di-*tert*-butylphenol (20.6 g, 100 mmol) and tributylamine (9.6 cm<sup>3</sup>, 40.0 mmol) in toluene (15 cm<sup>3</sup>) was added SnCl<sub>4</sub> (1.2 cm<sup>3</sup>, 10.0 mmol) dropwise under N<sub>2</sub>. White fumes appeared immediately during the addition and stirring was continued for 15 min at room temperature. Then paraformaldehyde (6.60 g, 220 mmol) was added in a single portion and the mixture was heated at 100 °C for 10 h. After cooling to room temperature, water (20 cm<sup>3</sup>) was added and the residue was extracted with Et<sub>2</sub>O (6 × 100 cm<sup>3</sup>). The combined extracts were dried over anhydrous MgSO<sub>4</sub>, concentrated and chromatographed using CHCl<sub>3</sub> / hexane (1:1) as eluent. The first band was collected and rotary evaporated to give a pale yellow solid. Yield: 19.2 g (82%). <sup>1</sup>H NMR (CDCl<sub>3</sub>): δ 9.87 (s, 1 H, CHO), 7.60 (d, *J* = 2.4 Hz, 1 H, ArH), 7.35 (d, *J* = 2.4 Hz, 1 H, ArH), 1.43 (s, 9 H, <sup>t</sup>Bu), 1.33 (s, 9 H, <sup>t</sup>Bu).

**3-*tert*-Butyl-2-hydroxybenzaldehyde.** This compound was synthesised from 3-*tert*-butylphenol (15.0 g, 100 mmol), tributylamine (9.6 cm<sup>3</sup>, 40.0 mmol), paraformaldehyde (6.60 g, 220 mmol), and SnCl<sub>4</sub> (1.2 cm<sup>3</sup>, 10.0 mmol) in toluene (15 cm<sup>3</sup>) using a procedure similar to that for the preparation of 3,5-di-*tert*-butyl-2-hydroxybenzaldehyde. The product was isolated as a pale yellow liquid. Yield: 13.4 g (75%). <sup>1</sup>H NMR (CDCl<sub>3</sub>): δ 9.87 (s, 1 H, CHO), 7.53 (dd, *J* = 1.7, 7.7 Hz, 1 H, ArH), 7.39 (dd, *J* = 1.7, 7.7 Hz, 1 H, ArH), 6.94 (t, *J* = 7.7 Hz, 1 H, ArH), 1.42 (s, 9 H, <sup>t</sup>Bu).

**5-*tert*-Butyl-2-hydroxybenzaldehyde.** This compound was synthesised from 5-*tert*-butylphenol (15.0 g, 100 mmol), tributylamine (9.6 cm<sup>3</sup>, 40.0 mmol), paraformaldehyde (6.60 g, 220 mmol), and SnCl<sub>4</sub> (1.2 cm<sup>3</sup>, 10.0 mmol) in toluene (15 cm<sup>3</sup>) using a procedure similar to that for the preparation of 3,5-di-*tert*-butyl-2-hydroxybenzaldehyde. The product was isolated as a pale brown liquid. Yield: 13.0 g (73%). <sup>1</sup>H NMR (CDCl<sub>3</sub>): δ 9.89 (s, 1 H, CHO), 7.59 (dd, *J* = 2.4, 8.7 Hz, 1 H, ArH), 7.52 (d, *J* = 2.4 Hz, 1 H, ArH), 6.94 (d, *J* = 8.7 Hz, 1 H, ArH), 1.33 (s, 9 H, <sup>t</sup>Bu).

## 2. Synthesis of mono- and di-*tert*-butyl substituted 2-hydroxybenzyl alcohols

**3,5-Di-*tert*-butyl-2-hydroxybenzyl alcohol.** NaBH<sub>4</sub> (1.13 g, 30.0 mmol) was slowly added to a solution of 3,5-di-*tert*-butyl-2-hydroxybenzaldehyde (3.52 g, 15.0 mmol) in MeOH (50 cm<sup>3</sup>). The reaction mixture turned from pale yellow to colourless during the addition and stirring was continued for 1 h at room temperature. All the volatiles were then removed using a rotary evaporator and the residue was mixed with water (50 cm<sup>3</sup>). The resulting mixture was neutralised with glacial acetic acid before being extracted with CH<sub>2</sub>Cl<sub>2</sub> (3 × 150 cm<sup>3</sup>). The combined extracts were dried over anhydrous MgSO<sub>4</sub>, concentrated to give a white crystalline solid. Yield: 3.44 g (97%). <sup>1</sup>H NMR (CDCl<sub>3</sub>): δ 7.53 (bs, 1 H, ArOH), 7.28 (s, 1 H, ArH), 6.90 (s, 1 H, ArH), 4.85 (s, 2 H, ArCH<sub>2</sub>), 1.43 (s, 9 H, <sup>t</sup>Bu), 1.28 (s, 9 H, <sup>t</sup>Bu).

**3-*tert*-Butyl-2-hydroxybenzyl alcohol.** This compound was synthesised from 3-*tert*-butyl-2-hydroxybenzaldehyde (4.34 g, 24.4 mmol) and NaBH<sub>4</sub> (1.84 g, 48.8 mmol) in MeOH (50 cm<sup>3</sup>) using a similar procedure as described for 3,5-di-*tert*-butyl-2-hydroxybenzyl alcohol. The product was isolated as a pale yellow liquid. Yield: 4.22 g (96%). <sup>1</sup>H NMR (CDCl<sub>3</sub>): δ 7.74 (s, 1 H, ArOH), 7.26 (dd, *J* = 1.2, 7.8 Hz, 1 H, ArH), 6.90 (d, *J* = 6.9 Hz, 1 H, ArH), 6.80 (t, *J* = 7.5 Hz, 1 H, ArH), 4.86 (s, 2 H, ArCH<sub>2</sub>), 1.44 (s, 9 H, <sup>t</sup>Bu).

**5-*tert*-Butyl-2-hydroxybenzyl alcohol.** This compound was synthesised from 5-*tert*-butyl-2-hydroxybenzaldehyde (3.77 g, 21.2 mmol) and NaBH<sub>4</sub> (1.60 g, 42.4 mmol) in MeOH (50 cm<sup>3</sup>) using a similar procedure as described for 3,5-di-*tert*-butyl-2-hydroxybenzyl alcohol. The product was isolated as a colourless liquid. Yield: 3.74 g (98%). <sup>1</sup>H NMR (CDCl<sub>3</sub>): δ 7.23 (dd, *J* = 2.1, 8.3 Hz, 1 H, ArH), 7.10 (bs, 1 H, ArOH), 7.05 (d, *J* = 2.4 Hz, 1 H, ArH), 6.82 (d, *J* = 8.1 Hz, 1 H, ArH), 4.85 (s, 2 H, ArCH<sub>2</sub>), 1.28 (s, 9 H, <sup>t</sup>Bu).

### 3. Synthesis of mono- and di-*tert*-butyl substituted 2-hydroxybenzyl bromides

**3,5-Di-*tert*-butyl-2-hydroxybenzyl bromide.** To a solution of 3,5-di-*tert*-butyl-2-hydroxybenzyl alcohol (3.44 g, 14.6 mmol) in CHCl<sub>3</sub> (50 cm<sup>3</sup>) was added PBr<sub>3</sub> (0.7 cm<sup>3</sup>, 7.3 mmol). White fumes appeared immediately during the addition and stirring was continued for 1 h at room temperature. Then cold water (30 cm<sup>3</sup>) was added with vigorous stirring for 2 min. The organic layer was separated and the aqueous residue was extracted with CHCl<sub>3</sub> (2 × 50 cm<sup>3</sup>). The combined extracts were dried over anhydrous MgSO<sub>4</sub>, concentrated and dried *in vacuo* to give a pale yellow liquid, which was used without further purification. Yield: 4.23 g (97%).

**3-*tert*-Butyl-2-hydroxybenzyl bromide.** This compound was synthesised from 3-*tert*-butyl-2-hydroxybenzyl alcohol (4.22 g, 23.4 mmol) and PBr<sub>3</sub> (1.1 cm<sup>3</sup>, 11.7 mmol) in CHCl<sub>3</sub> (50 cm<sup>3</sup>) using a procedure similar to that for the preparation of 3,5-di-*tert*-butyl-2-hydroxybenzyl bromide. The product was obtained as a pale yellow liquid. Yield: 5.57 g (98%).

**5-*tert*-Butyl-2-hydroxybenzyl bromide.** This compound was synthesised from 5-*tert*-butyl-2-hydroxybenzyl alcohol (3.74 g, 20.8 mmol) and PBr<sub>3</sub> (1.0 cm<sup>3</sup>, 10.4 mmol) in CHCl<sub>3</sub> (50 cm<sup>3</sup>) using a procedure similar to that for the preparation of 3,5-di-*tert*-butyl-2-hydroxybenzyl bromide. The product was obtained as a pale yellow liquid. Yield: 4.95 g (98%).

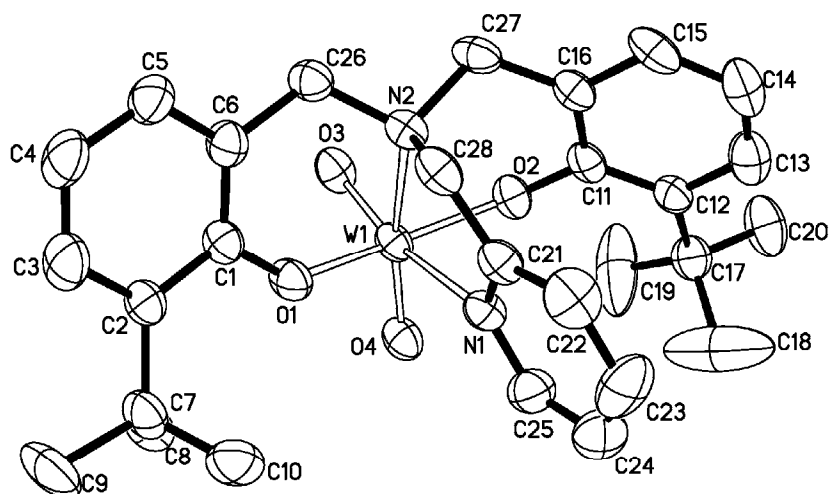

**Figure S1.** Molecular structure and atom labelling scheme for [WO<sub>2</sub>(L<sup>2</sup>)].  
Hydrogen atoms are omitted for clarity.
